# Supplementary material
Source: PubMed Central journal article supplement (PMC6698896)
Supplement: NIHMS1046294-supplement-1.pdf [file NIHMS1046294-supplement-1.pdf]

Interrupted Pressure-Jump NMR Experiments  
Reveal Resonances of On-Pathway Protein Folding  
Intermediate

*Cyril Charlier<sup>‡</sup>, Joseph M. Courtney<sup>‡</sup>, Philip Anfinrud, and Ad Bax\**

Laboratory of Chemical Physics, NIDDK, National Institutes of Health, Bethesda, MD, 20892-  
0520, USA

SUPPORTING INFORMATION

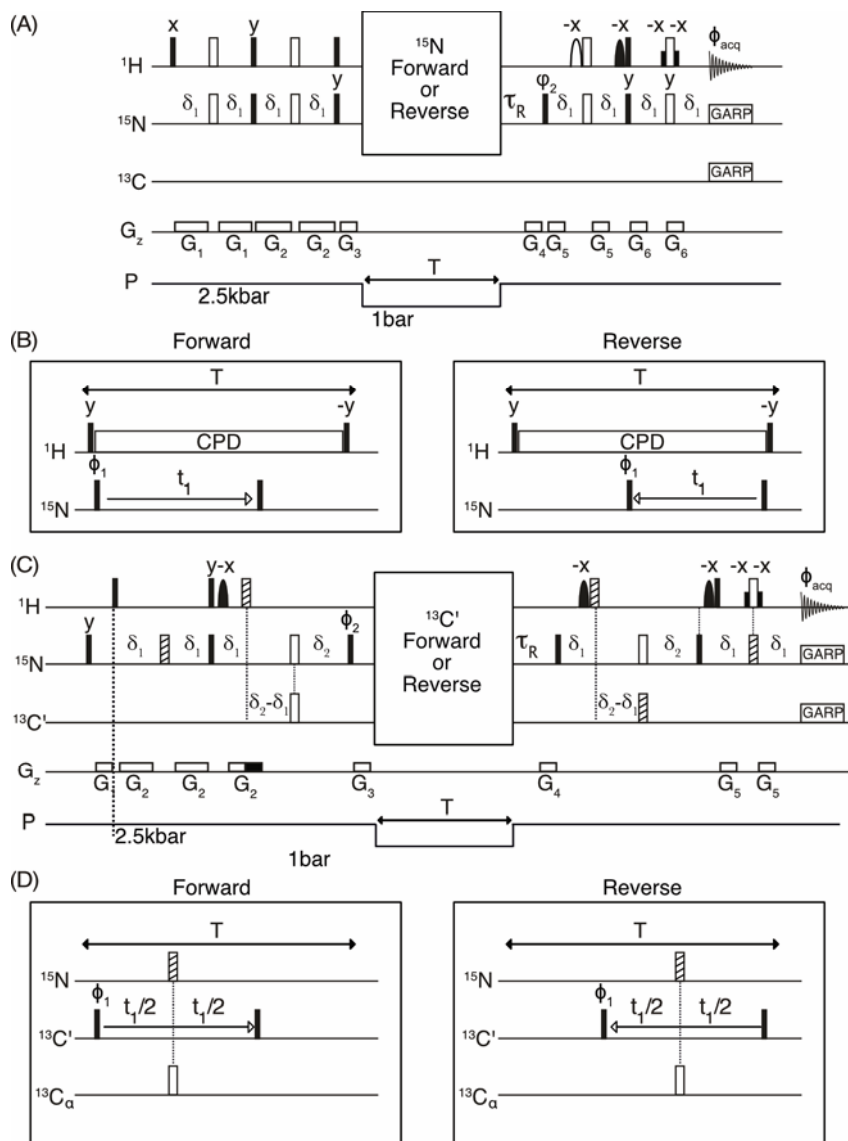

**Figure S1.** Pressure-jump 2D pulse schemes for correlating the <sup>15</sup>N and <sup>13</sup>C' chemical shifts of the unfolded, intermediate, and folded states at 1 bar, to <sup>1</sup>H<sup>N</sup> shifts at high pressure. The magnetization is transferred from <sup>1</sup>H to (A) <sup>15</sup>N or (C) <sup>13</sup>C' at 2.5 kbar and then the pressure is dropped to 1 bar, prior to t<sub>1</sub> evolution of (A,B) the <sup>15</sup>N or (C,D) <sup>13</sup>C' frequency. Evolution of transverse (B) <sup>15</sup>N or (D) <sup>13</sup>C' is encoded by a 90°<sub>φ<sub>1</sub></sub> – t<sub>1</sub> – 90°<sub>x</sub> pulse pair, with the first pulse applied immediately after the pressure-drop is completed (Forward sampling) or with the second pulse applied just prior to the switch back to high pressure (Reverse sampling). In both cases, the second 90° stores a cosine- (or sine-) modulated fraction of the <sup>15</sup>N or <sup>13</sup>C' magnetization along z, with residual transverse magnetization destroyed by gradient G<sub>4</sub>. After the pressure is jumped back to 2.5 kbar, the t<sub>1</sub>-encoded z magnetization is transferred back to <sup>1</sup>H for detection. Filled and open symbols on the <sup>1</sup>H and <sup>15</sup>N radiofrequency channels represent 90° and 180° pulses, respectively. Shaped pulses are selectively applied to the water resonance, as are the weak rectangular 90° pulses that are part of the standard WATERGATE element.<sup>1</sup> Unless indicated, pulse phases are x. Data were recorded with φ<sub>1</sub> = {x, -x}, φ<sub>2</sub> = {x, x, -x, -x}, φ<sub>acq</sub> = {x, -x, -x, x}; Hatched rectangles indicate 90°<sub>x</sub>-210°<sub>y</sub>-90°<sub>x</sub> composite pulses.<sup>2</sup> The INEPT delays are δ<sub>1</sub>=2.56 ms and δ<sub>2</sub>= 15.3 ms. The maximum t<sub>1</sub> evolution time is 60 ms and the total low-pressure period is 70 ms. Pulsed field gradients are either sine-bell shaped

( $G_{3,4}$ ) or weak, rectangular ( $G_{1,2,4,5}$ ).  $^1\text{H}$  decoupling during  $^{15}\text{N}$  evolution (labeled CPD) uses the WALTZ16 modulation scheme, remains on during the full low-pressure period, and is bracketed by  $90^\circ$  pulses to return the water magnetization parallel to the CPD radiofrequency field and back to the  $z$  axis. Short (5 ms) “padding” delays separate the midpoints of the pressure jumps from application of the first (for forward sampling) or last (for reverse sampling)  $90^\circ$  pulses that initiate and terminate the  $t_1$  evolution period, thereby ensuring that the slower tail of the pressure jump does not impact evolution, and to accommodate potential fluctuations in the mechanical valve timing. The recovery delay,  $\tau_R$  ( $\sim 150$  ms), serves to let die down any vibrations and sample flow which can have adverse effects on  $^1\text{H}$  signal detection and rephasing by pulsed field gradients.

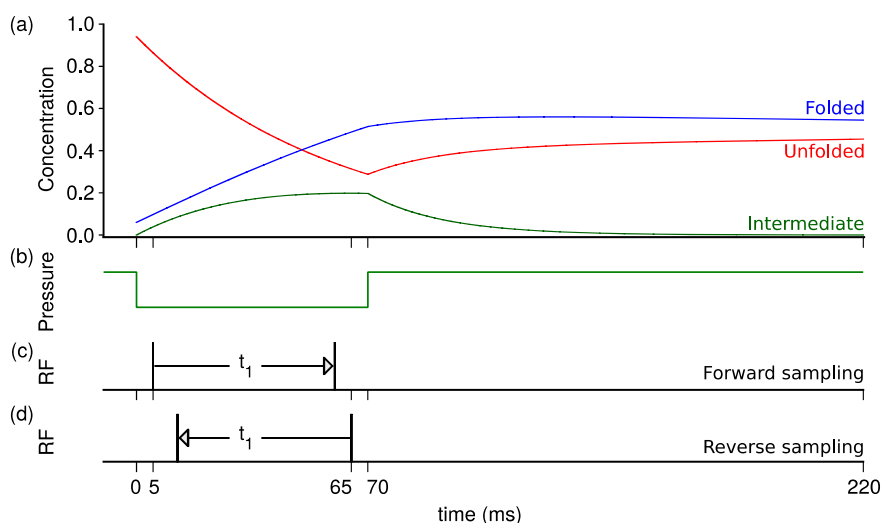

**Figure S2.** Evolution of the concentration of the unfolded, intermediate, and folded species in a pressure-jump experiment of the type shown in Figure 1, main text. (A) Concentration as a function of time: folded (blue), unfolded (red) and intermediate (green) obtained by the integration of a 3-state rate equation (Eq SI.1) where  $[U](t)$ ,  $[F](t)$  and  $[I](t)$  are the respective concentrations, and  $k$  are the rate constants for the different transitions.

$$\frac{d}{dt} \begin{bmatrix} [U](t) \\ [I](t) \\ [F](t) \end{bmatrix} = \begin{bmatrix} -(k_{U \rightarrow I} + k_{U \rightarrow F}) & k_{I \rightarrow U} & k_{F \rightarrow U} \\ k_{U \rightarrow I} & -(k_{I \rightarrow U} + k_{I \rightarrow F}) & k_{F \rightarrow I} \\ k_{U \rightarrow F} & k_{I \rightarrow F} & -(k_{F \rightarrow U} + k_{F \rightarrow I}) \end{bmatrix} \begin{bmatrix} [U](t) \\ [I](t) \\ [F](t) \end{bmatrix} \quad (\text{SI.1})$$

After the initial high-pressure period ( $\sim 8$  s), 94% of the protein is in the unfolded states ( $t = 0$ ). During the low-pressure period the previously derived rate constants<sup>3</sup> are  $k_{U \rightarrow F} = 8 \text{ s}^{-1}$ ,  $k_{U \rightarrow I} = 8.9 \text{ s}^{-1}$ ,  $k_{I \rightarrow F} = 14.2 \text{ s}^{-1}$  with all other rates zero. During the high-pressure period, the rates used for the simulation are  $k_{F \rightarrow U} = 0.4 \text{ s}^{-1}$ ,  $k_{I \rightarrow U} = 30 \text{ s}^{-1}$ ,  $k_{I \rightarrow F} = 14.2 \text{ s}^{-1}$ , with all other rates set to zero. Note that no experimental values for  $k_{I \rightarrow U}$  and  $k_{I \rightarrow F}$  at high pressure were measured, but their ratio is approximately two based on peak intensity ratios, and the sum of their rates is  $\geq 30 \text{ s}^{-1}$ . The  $t_1$  evolution period is padded at either end by 5-ms delays to minimize the effect of small experimental jitter in the valve opening and closing times, and allow for pressure equilibration which switches to slow, laminar flow when the sample cell approaches its target pressure.

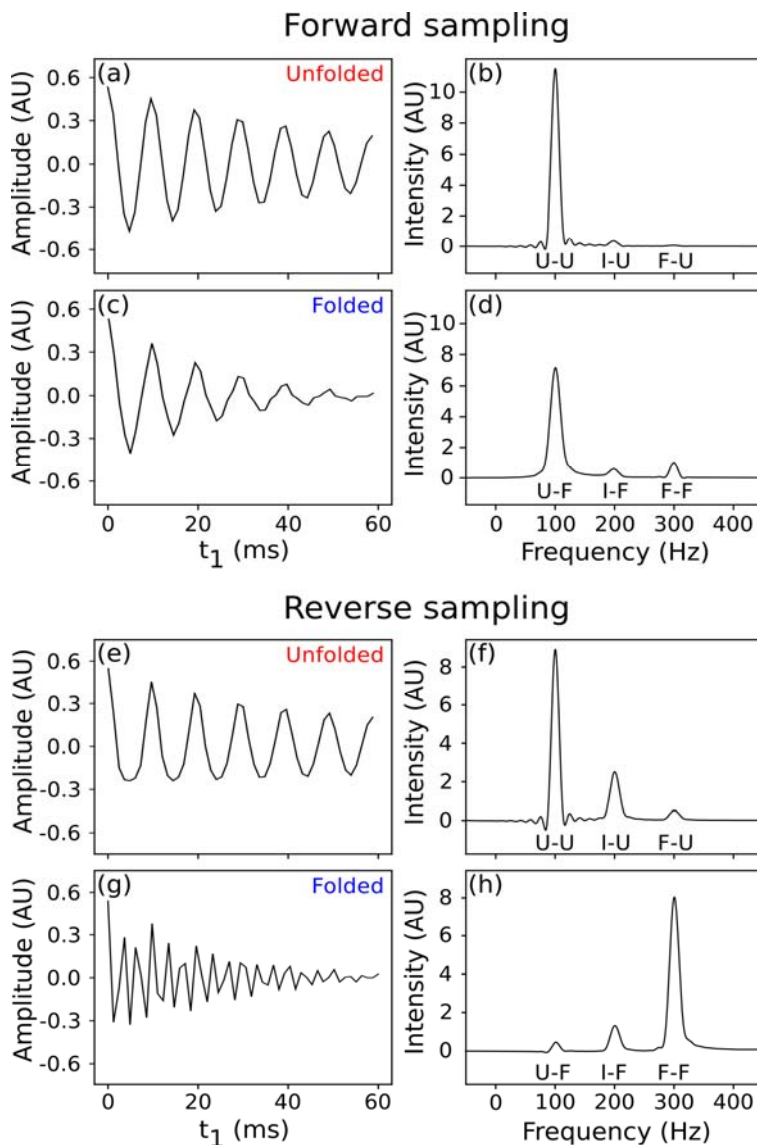

**Figure S3.** Simulation of forward and reverse sampled NMR data with the pulse scheme of Figure S1A,B, using the populations of the U, I, and F states shown in Figure S2. Simulated interferograms ( $t_1$  dimension; left column) corresponding to  $t_1$ -modulated magnetization of the unfolded (A,E) and folded (C,G) species just before transfer to  $^1\text{H}$  for detection (i.e. the end of the time course shown in figure S2). Fourier transformed interferograms (right column) for the species that are unfolded (B,F) and folded (D,H) during the high-pressure  $^1\text{H}$  detection period. The concentration of the intermediate species is negligible at this point and is therefore not shown. The folded, I, and F species are set to frequencies of 100, 200, and 300 Hz, respectively. The pulse sequence with pressure jumps depicted in Figure S2 was simulated by integrating the Bloch-McConnell equation for non-equilibrium reactions.<sup>4</sup> The simulation began with Z magnetization of all three species at equilibrium concentrations. The second pulse in each scan was phase cycled to rotate either the X- or Y-component of the magnetization back to the Z-axis and to suppress axial peaks. At the end of each scan, the signal was “detected” by extracting the Z component of the magnetization for each species. The resulting FIDs for each of the species were then apodized with a cosine bell, zero-filled, and Fourier transformed. Note that the very weak I-U, I-F and F-F signals in the forward sampled spectra result from processes during the 5-ms “padding delay” that precedes  $t_1$ .

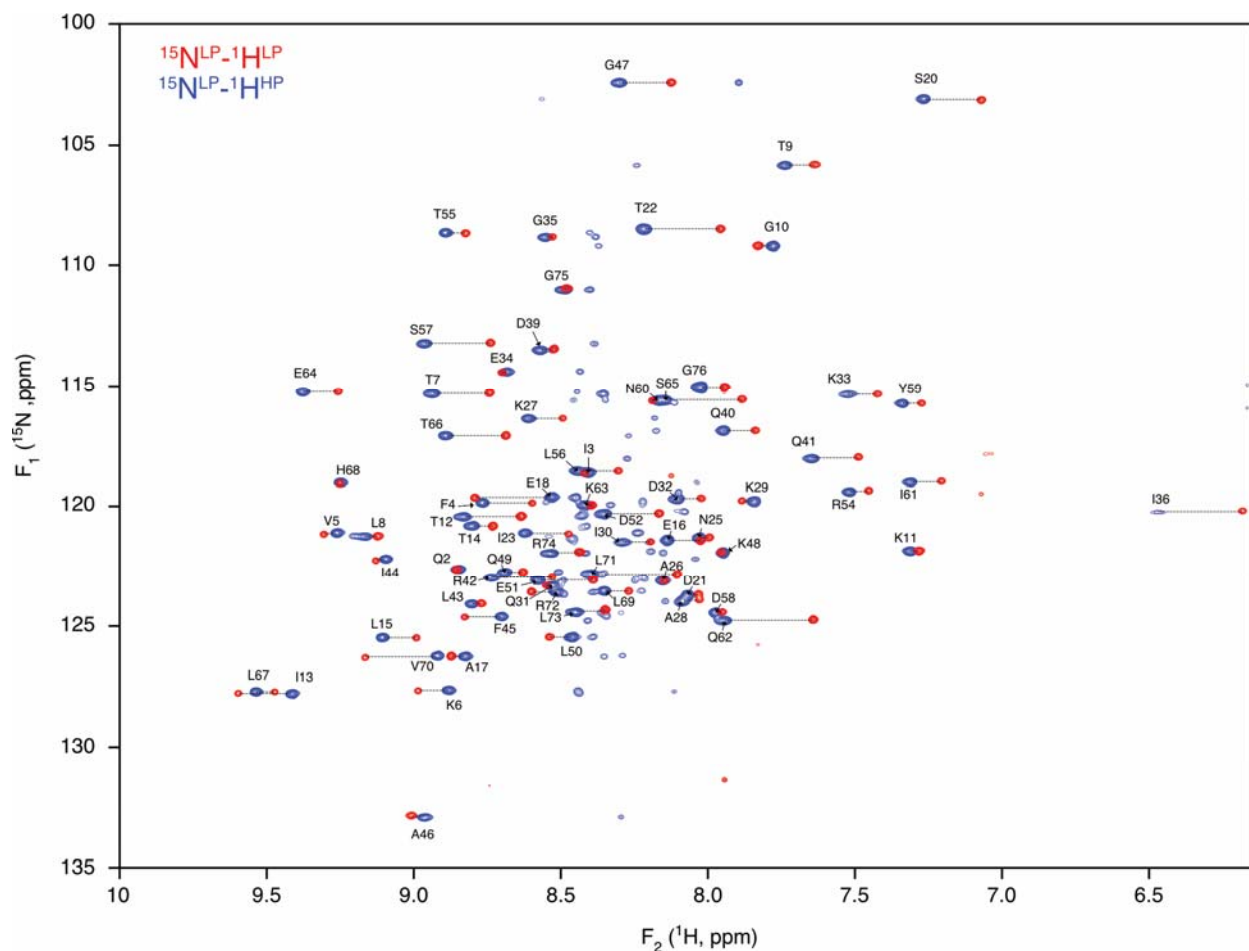

**Figure S4.** Pressure-jump HSQC spectrum (blue contours, labeled by residue type and number) of VA2-ubiquitin, recorded at 600 MHz, pH 6.4, with the temperature regulated at 22 °C during the long (9 s) low pressure equilibration and  $t_1$  evolution delay, superimposed on a regular, 1-bar HSQC spectrum (red contours). Weak, unlabeled blue peaks correspond to proteins that unfolded during the ~150-ms vibration recovery delay, prior to detection of the  $^1\text{H}$  signals, appearing at the folded  $^{15}\text{N}$  frequency at 1 bar correlated to unfolded protein  $^1\text{H}^{\text{N}}$  frequency at 2.5 kbar. The spectrum was recorded with the forward scheme of Figure S1A, but the pressure kept low during the preparation interval, and only switched to high (2.5 kbar) from the end of  $t_1$  evolution until the end of  $^1\text{H}$  data acquisition. The spectrum was recorded with 4 scans per complex  $t_1$  increment, for a total duration of 2.5 h.

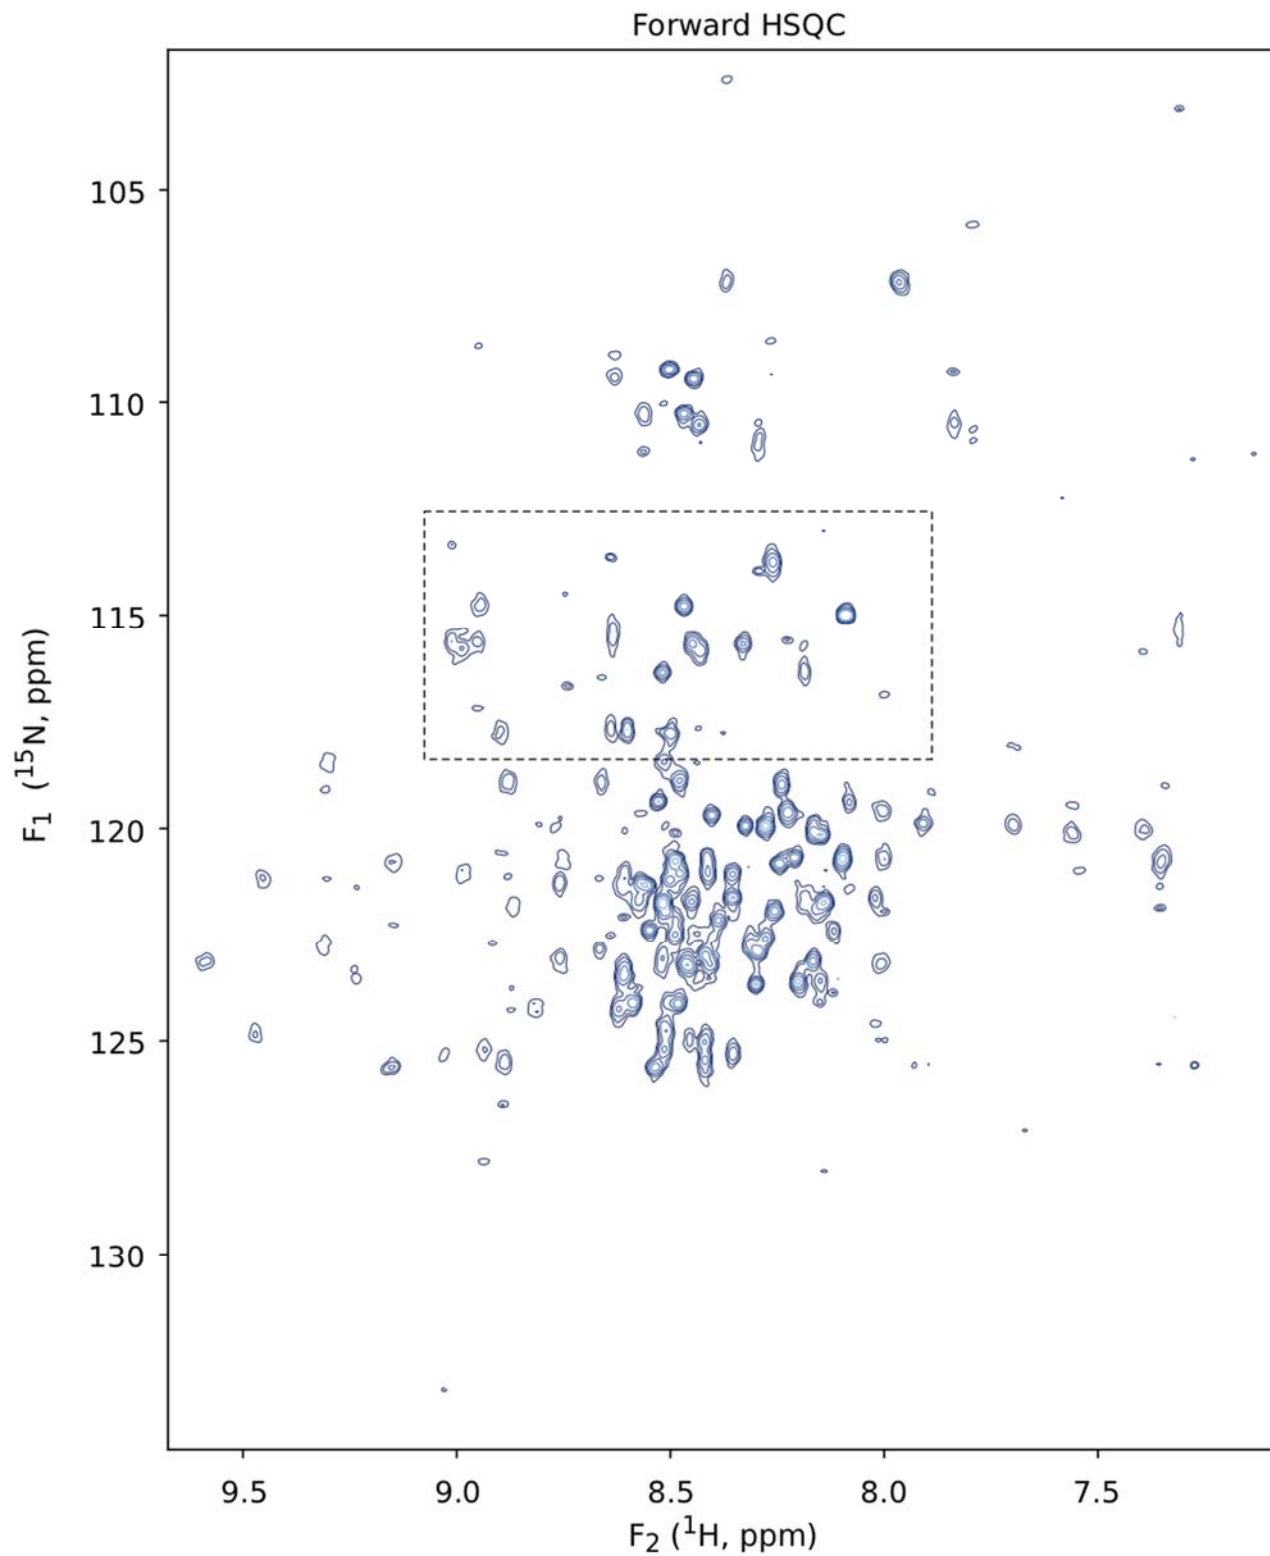

**Figure S5.** Pressure-jump forward-sampled 2D  $^1\text{H}$ - $^{15}\text{N}$  HSQC spectrum of VA2-ubiquitin, with the boxed region shown in Figure 2, main text.

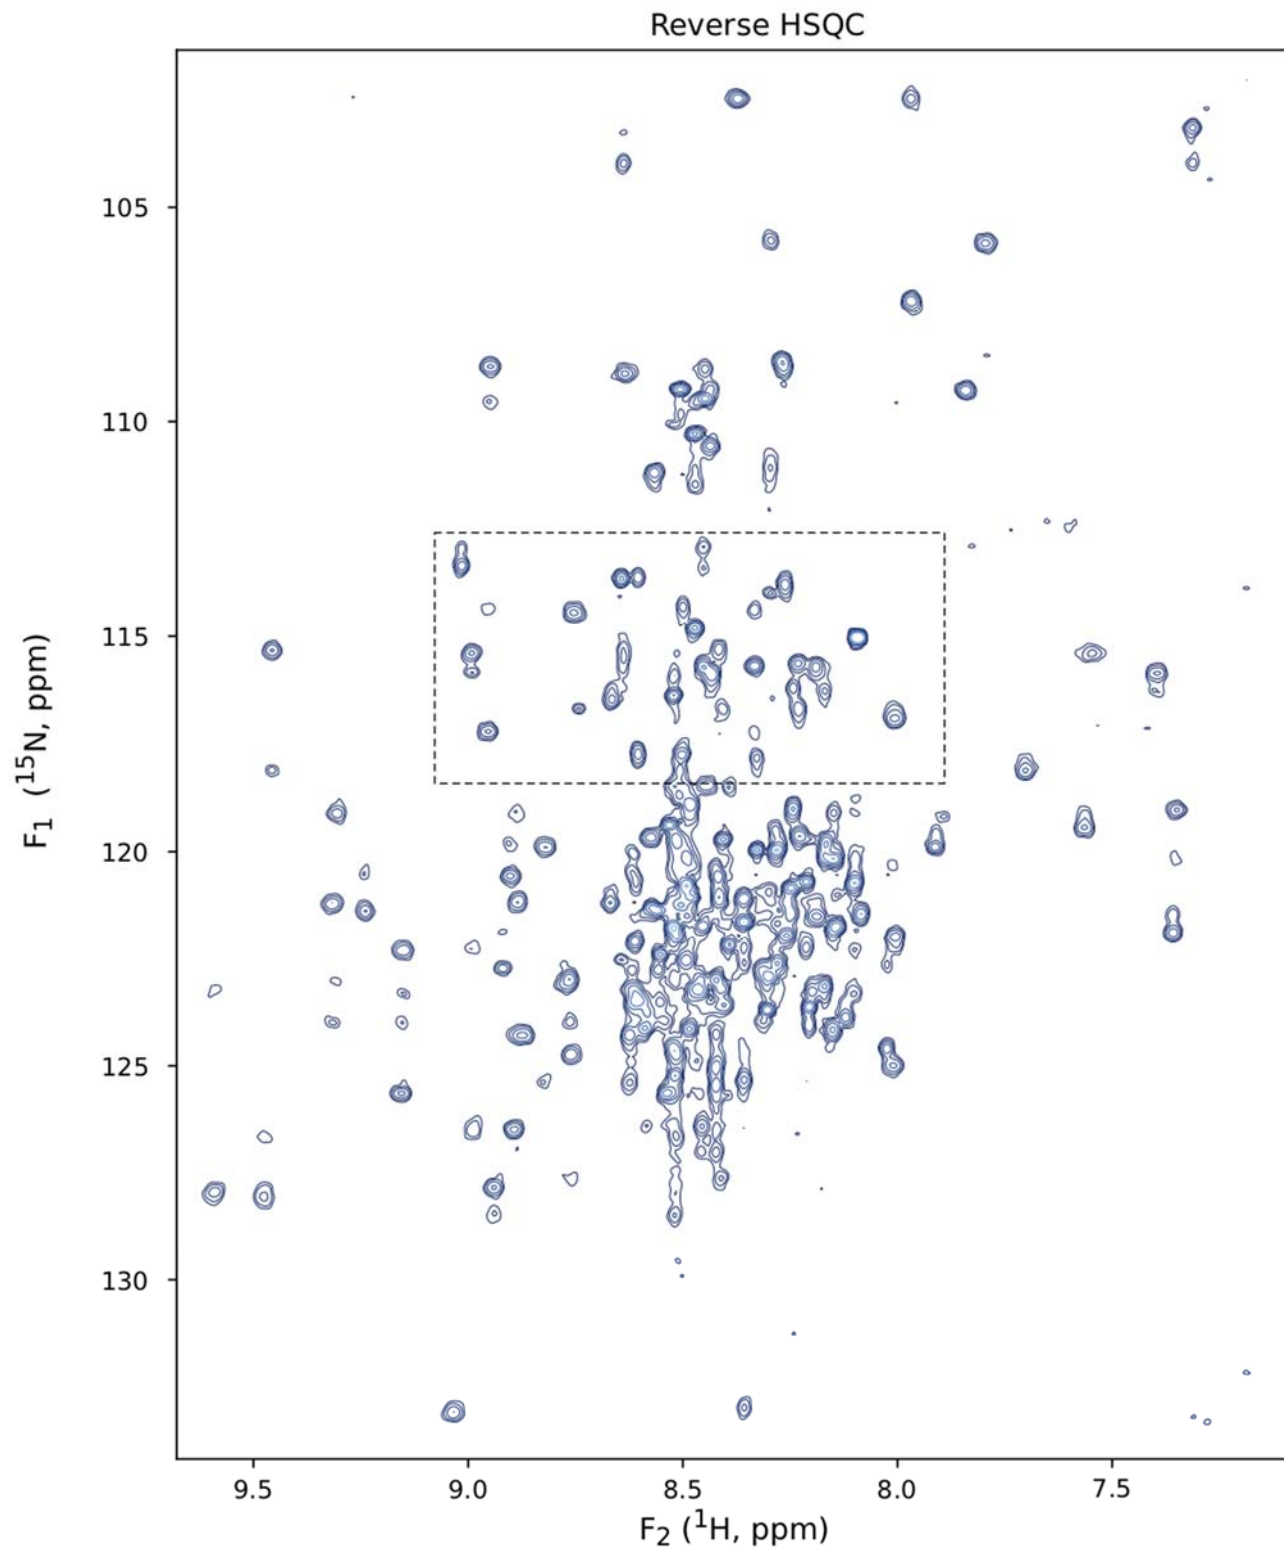

**Figure S6.** Pressure-jump reverse-sampled 2D  $^1\text{H}$ - $^{15}\text{N}$  HSQC spectrum of VA2-ubiquitin with the boxed region shown in Figure 2, main text. Peak positions of the I-state correspond to those of Table S1.

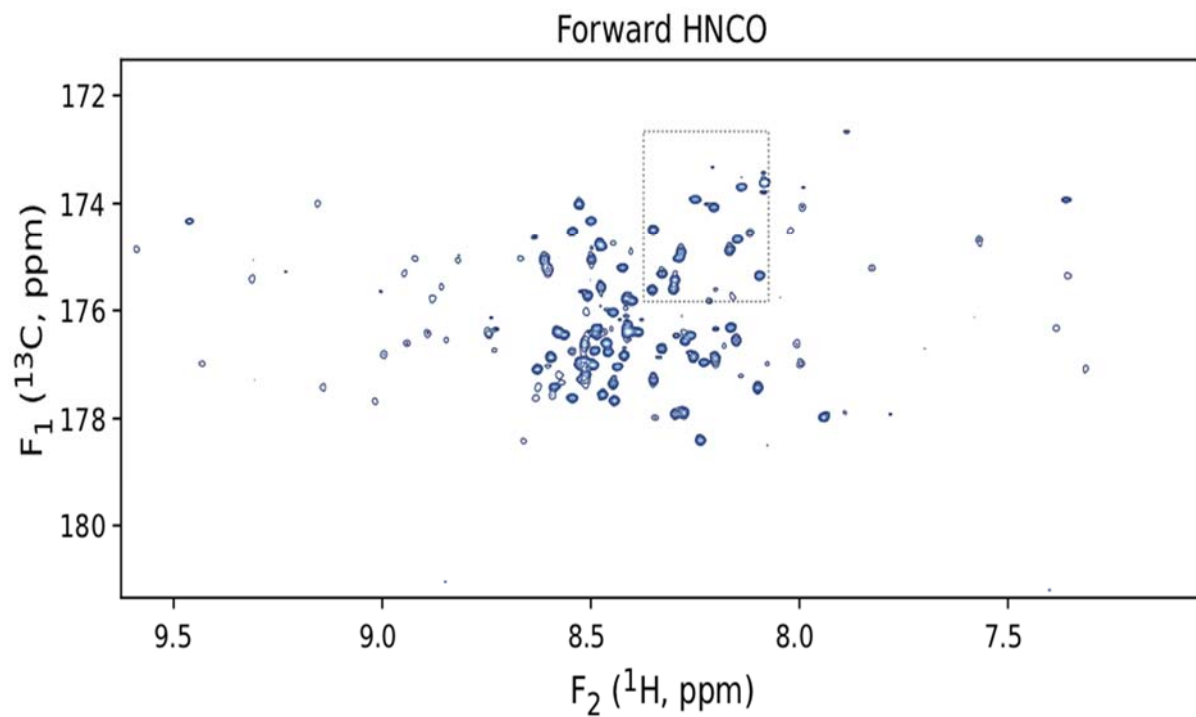

**Figure S7.** Pressure-jump forward-sampled 2D  $^1\text{H}$ - $^{13}\text{C}$  HNC0 spectrum of VA2-ubiquitin, with the boxed region shown in Figure 3, main text

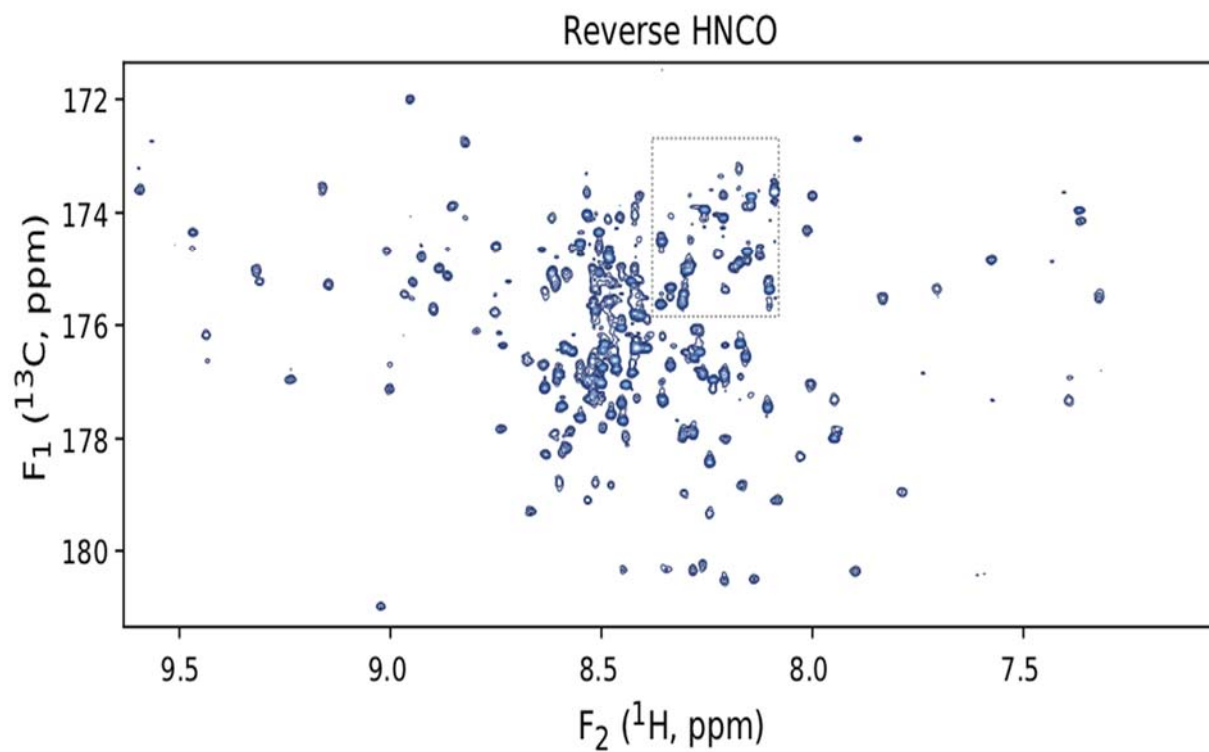

**Figure S8.** Pressure-jump reverse-sampled 2D  $^1\text{H}$ - $^{13}\text{C}$  HNC0 spectrum of VA2-ubiquitin, with the boxed region shown in Figure 3, main text. Peak positions of the I-state correspond to those of Table S1.



Table S1. Intermediate chemical shifts of VA2-ubiquitin at 1 bar.

| Res | <sup>13</sup> C'(I) | <sup>15</sup> N(I) | <sup>1</sup> H(U) | <sup>1</sup> H(F) | Res | <sup>13</sup> C'(I) | <sup>15</sup> N(I) | <sup>1</sup> H(U) | <sup>1</sup> H(F) |
|-----|---------------------|--------------------|-------------------|-------------------|-----|---------------------|--------------------|-------------------|-------------------|
| M1  |                     |                    |                   |                   | D39 | 177.13              | 113.55             | 8.59              | 8.63              |
| Q2  | 174.12              |                    |                   | 8.89              | Q40 | 175.51              | 116.82             | 8.22              | 8.00              |
| I3  | 174.10              | 121.40             | 8.48              | 8.49              | Q41 | 176.12              | 118.00             | 8.33              | 7.69              |
| F4  | 175.06              | 125.28             | 8.63              | 8.82              | R42 | 173.89              | 123.00             | 8.28              | 8.77              |
| V5  | 174.58              | 123.91             | 8.30              | 9.31              | L43 | 175.23              | 124.19             | 8.15              | 8.85              |
| K6  | 176.70              | 128.37             | 8.51              | 8.93              | I44 | 175.47              | 123.24             | 8.10              | 9.14              |
| T7  | 177.01              |                    | 8.43              | 9.00              | F45 | 174.43              | 127.54             | 8.41              | 8.75              |
| L8  | 178.96              | 120.43             | 8.61              | 9.23              | A46 | 177.31              | 132.99             | 8.36              | 9.02              |
| T9  | 175.57              |                    | 8.29              | 7.78              | G47 | 174.27              | 102.36             | 7.95              | 8.36              |
| G10 | 174.11              | 109.21             | 8.43              | 7.83              | K48 | 174.62              | 121.87             | 8.21              | 7.99              |
| K11 | 175.73              | 121.35             | 8.25              | 7.35              | Q49 | 175.92              | 123.88             | 8.57              | 8.75              |
| T12 | 174.64              | 120.47             | 8.49              | 8.89              | L50 | 176.73              | 126.26             | 8.45              | 8.52              |
| I13 | 174.65              | 126.57             | 8.50              | 9.47              | E51 | 175.20              | 122.70             | 8.56              | 8.64              |
| T14 | 173.79              | 118.82             | 8.48              | 8.87              | D52 |                     |                    | 8.46              | 8.42              |
| L15 | 174.99              |                    | 8.55              | 9.16              | G53 | 174.84              | 109.74             | 8.49              |                   |
| E16 | 175.86              |                    | 8.54              | 8.17              | R54 | 175.54              | 119.04             | 8.14              | 7.56              |
| A17 | 175.09              |                    | 8.41              | 8.89              | T55 | 176.57              | 109.45             | 8.47              | 8.94              |
| E18 | 174.84              | 119.58             | 8.52              | 8.58              | L56 | 180.47              | 120.01             | 8.50              | 8.50              |
| P19 | 175.40              |                    |                   |                   | S57 | 177.01              | 112.84             | 8.44              | 9.01              |
| S20 | 174.63              | 103.87             | 8.63              | 7.31              | D58 | 176.93              | 122.54             | 8.36              | 8.02              |
| D21 | 176.33              | 123.43             | 8.54              | 8.11              | Y59 | 174.75              | 116.17             | 8.17              | 7.39              |
| T22 | 176.64              |                    | 8.26              | 8.26              | N60 | 175.67              | 116.60             | 8.40              | 8.22              |
| I23 |                     | 121.10             | 8.30              | 8.68              | I61 | 174.32              | 120.09             | 8.10              | 7.34              |
| E24 | 179.09              |                    | 8.61              |                   | Q62 | 175.90              | 120.22             | 8.45              | 7.99              |
| N25 | 178.00              | 121.36             | 8.53              | 8.08              | K63 | 176.65              |                    | 8.39              | 8.48              |
| A26 | 179.26              | 123.21             | 8.31              | 8.19              | E64 | 177.16              | 118.04             | 8.50              | 9.44              |
| K27 | 180.52              | 116.40             | 8.25              | 8.65              | S65 | 174.07              | 115.65             | 8.52              | 8.19              |
| A28 | 180.30              | 124.00             | 8.21              | 8.13              | T66 | 173.22              | 114.27             | 8.33              | 8.95              |
| K29 | 180.30              | 119.83             | 8.28              | 7.90              | L67 | 174.32              | 123.13             | 8.17              | 9.59              |
| I30 | 178.26              | 121.08             | 8.26              | 8.35              | H68 | 174.49              | 122.92             | 8.52              | 9.30              |
| Q31 | 178.72              |                    | 8.59              | 8.58              | L69 | 176.19              | 121.56             | 8.29              | 8.39              |
| D32 | 177.31              | 119.79             | 8.52              | 8.17              | V70 | 175.14              | 122.17             | 8.36              | 8.97              |
| K33 | 177.21              | 115.26             | 8.41              | 7.54              | L71 | 175.13              | 126.91             | 8.42              | 8.44              |
| E34 | 177.95              | 114.38             | 8.49              | 8.73              | R72 | 174.10              | 126.31             | 8.44              | 8.58              |
| G35 | 173.88              | 108.83             | 8.44              | 8.61              | L73 | 178.83              | 120.26             | 8.42              | 8.51              |
| I36 |                     |                    | 8.15              | 6.45              | R74 | 176.91              | 123.08             | 8.47              | 8.60              |
| P37 |                     |                    |                   |                   | G75 | 173.64              | 111.35             | 8.46              | 8.55              |
| P38 | 178.28              |                    |                   |                   | G76 |                     |                    | 8.09              | 8.09              |

## References

1. Piotto, M.; Saudek, V.; Sklenar, V., Gradient-Tailored Excitation for Single-Quantum Nmr-Spectroscopy of Aqueous-Solutions. *J. Biomol. NMR* **1992**, *2* (6), 661-665.
2. Levitt, M. H.; Freeman, R., Compensation for pulse imperfections in NMR spin-echo experiments. *J. Magn. Reson.* **1981**, *43* (1), 65-80.
3. Charlier, C.; Courtney, J. M.; Alderson, T. R.; Anfinrud, P.; Bax, A., Monitoring N-15 Chemical Shifts During Protein Folding by Pressure-Jump NMR. *J. Am. Chem. Soc.* **2018**, *140* (26), 8096-8099.
4. Helgstrand, M.; Hard, T.; Allard, P., Simulations of NMR pulse sequences during equilibrium and non-equilibrium chemical exchange. *J. Biomol. NMR* **2000**, *18* (1), 49-63.
